# Supplementary material for: Multiferroic properties and magnetoelectric coupling in Fe/Co co-doped Bi3.25La0.75Ti3O12 ceramics
Source: Royal Society of Chemistry journal article supplement (doi:10.1039/c5tc02399h), 2015-01-01
Supplement: c5tc02399h1.pdf [file c5tc02399h1.pdf]

## Electronic Supplementary Information

### **Multiferroic properties and magnetoelectric coupling in Fe/Co co-doped $\text{Bi}_{3.25}\text{La}_{0.75}\text{Ti}_3\text{O}_{12}$ ceramics**

**Ruixia Ti,<sup>a</sup> Xiaomei Lu,<sup>\*a,b</sup> Ju He,<sup>a</sup> Fengzhen Huang,<sup>a,b</sup> Huarui Wu,<sup>a</sup> Fang Mei,<sup>a</sup>  
Min Zhou,<sup>a</sup> Yang Li,<sup>a</sup> Tingting Xu,<sup>a</sup> and Jinsong Zhu<sup>a,b</sup>**

<sup>a</sup> National Laboratory of Solid State Microstructures and Physics School, Nanjing University, Nanjing 210093, People's Republic of China

<sup>b</sup> Collaborative Innovation Center of Advanced Microstructures, Nanjing University, Nanjing 210093, People's Republic of China

*\* Corresponding Author: xiaomeil@nju.edu.cn*

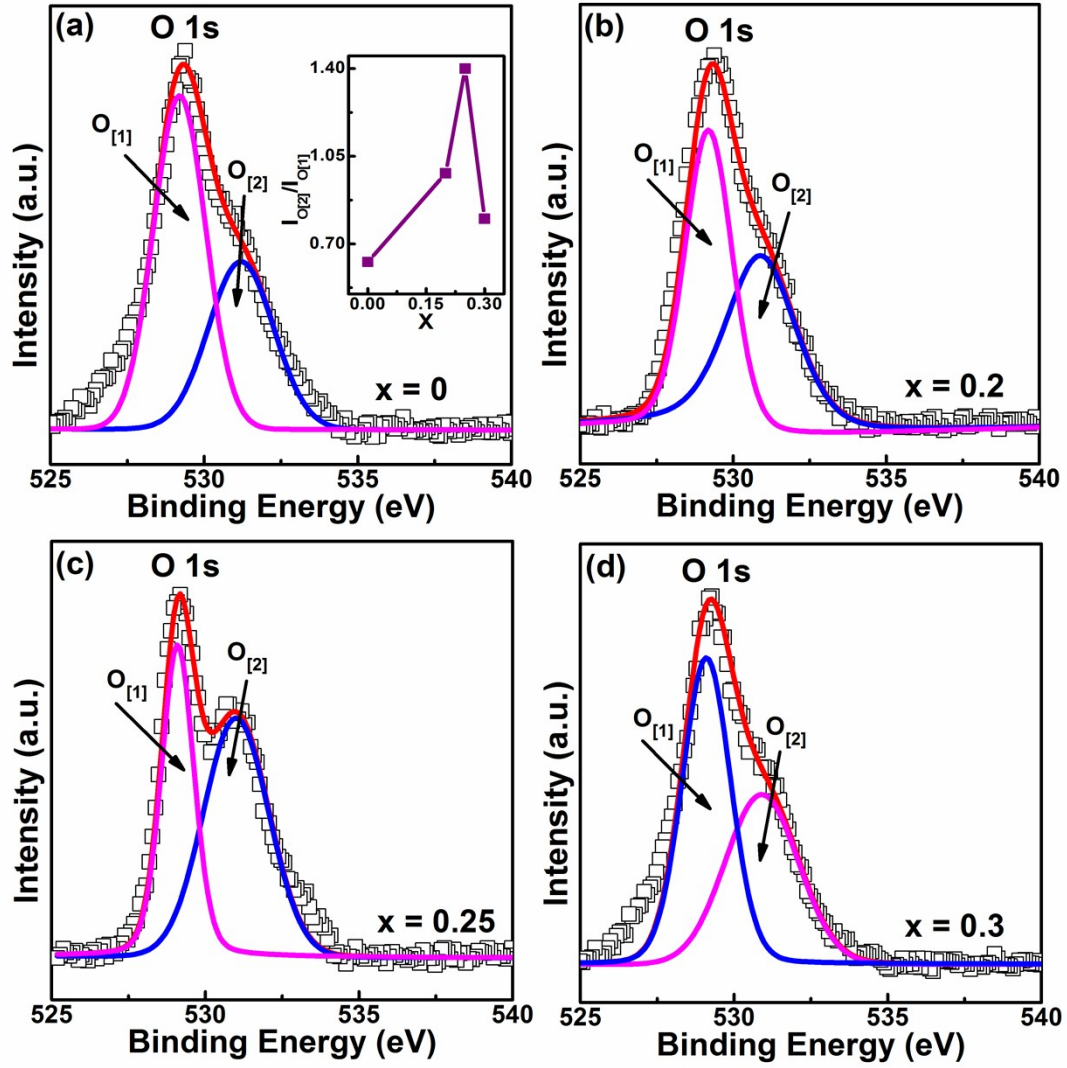

**Fig. S1** O 1s spectra (hollow squares) and their Lorentzian-Gaussian dividing results (solid lines) for the samples with  $x = 0, 0.2, 0.25$  and  $0.3$ . Inset shows  $x$  dependent  $I_{O[2]}/I_{O[1]}$ .

The x-ray photoelectron spectroscopy (XPS) were measured by Thermal Scientific using Al  $K\alpha$ . As shown in Fig. S1, O 1s spectra can be fitted into two peaks. The fitted peak with lower binding energy of about 529.2 eV, denoted by O[1], represents the oxygen in the lattice, while the other one at about 531.2 eV, denoted by O[2], is assigned to absorbed oxygen species, relating to the presence of oxygen vacancies (Huang et al., *Appl. Phys. Lett.*, 2014, 105, 022904). The relative amount of oxygen vacancies can be estimated by  $I_{O[2]}/I_{O[1]}$  ( $I_O$  represents the area of the corresponding peak).

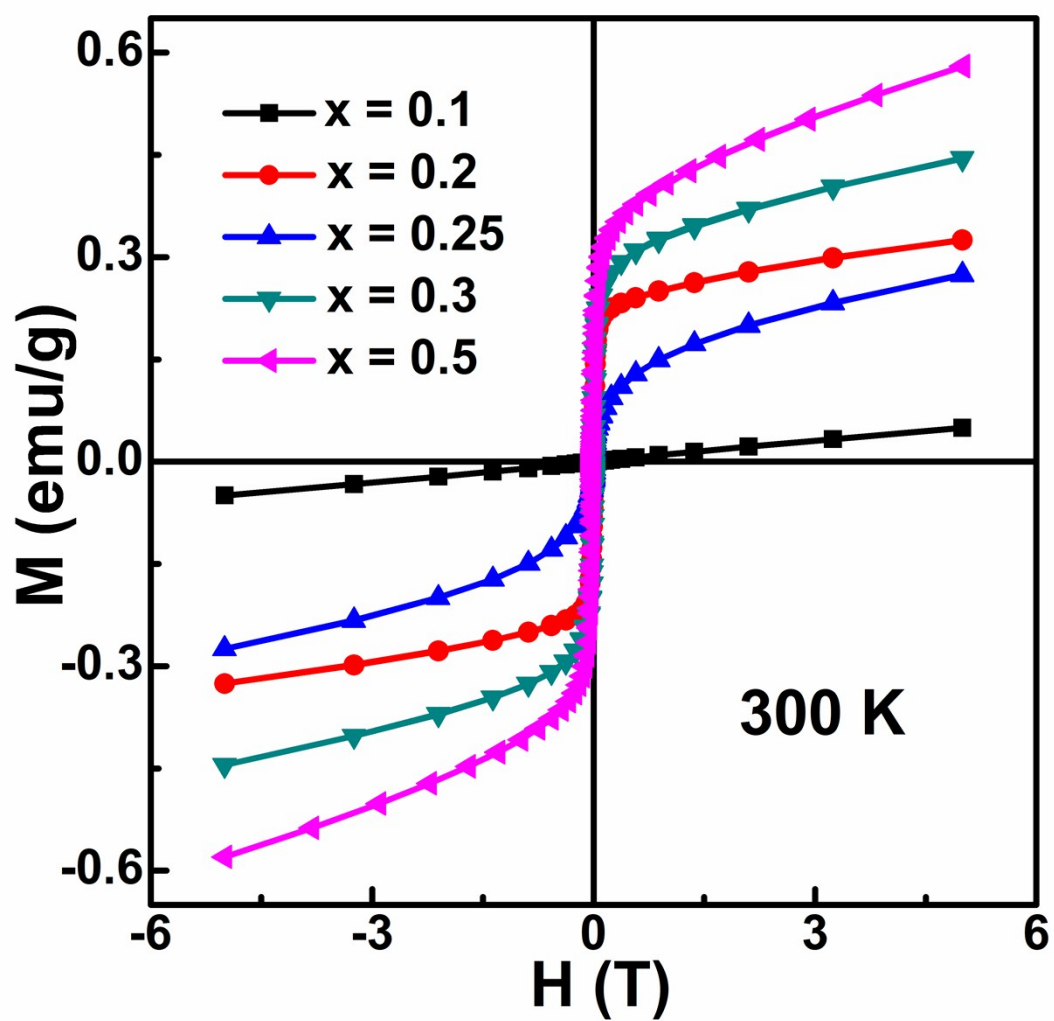

**Fig. S2** Magnetic Hysteresis ( $M$ - $H$ ) loops of the BLTFC ( $x \neq 0$ ) ceramics measured at room temperature.

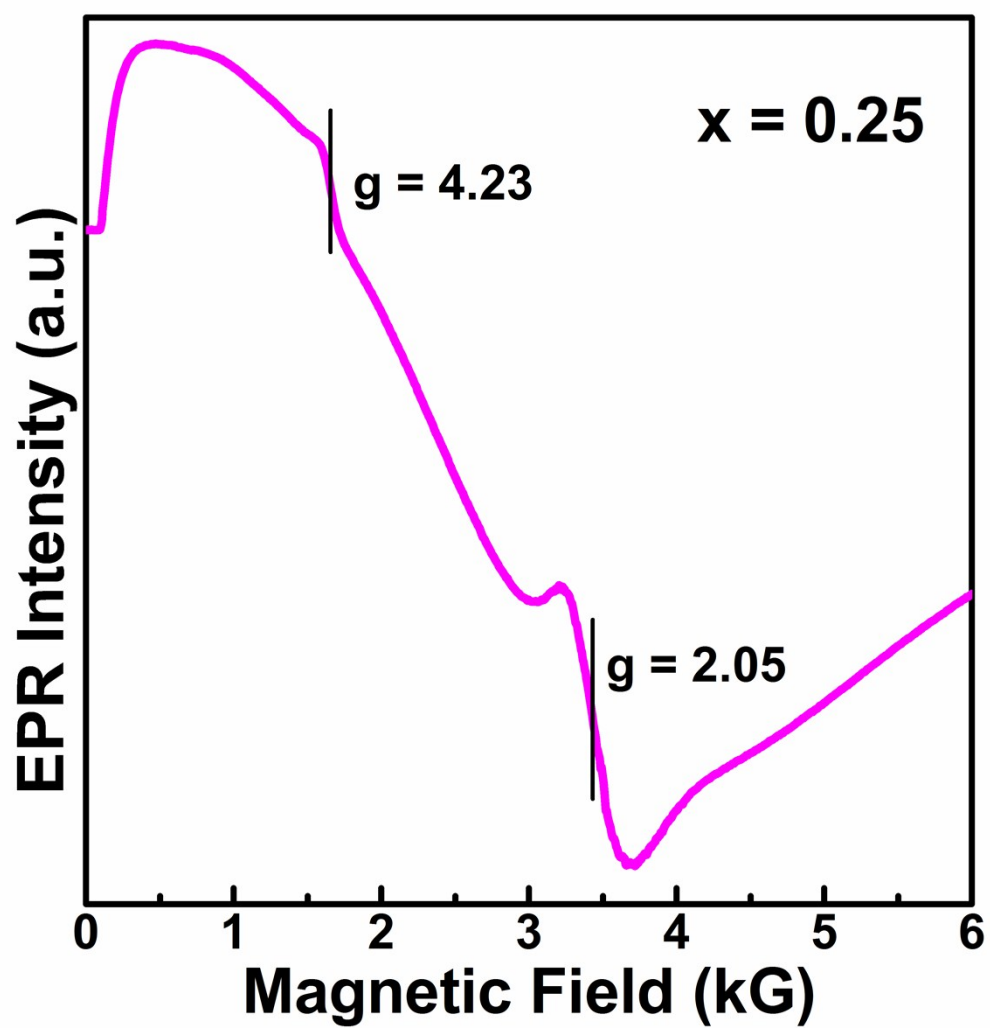

**Fig. S3** EPR spectrum performed on an x-band Bruker EMX plus 10/12 cm spectrometer operating at 9.85 GHz for the  $x = 0.25$  sample at room temperature.

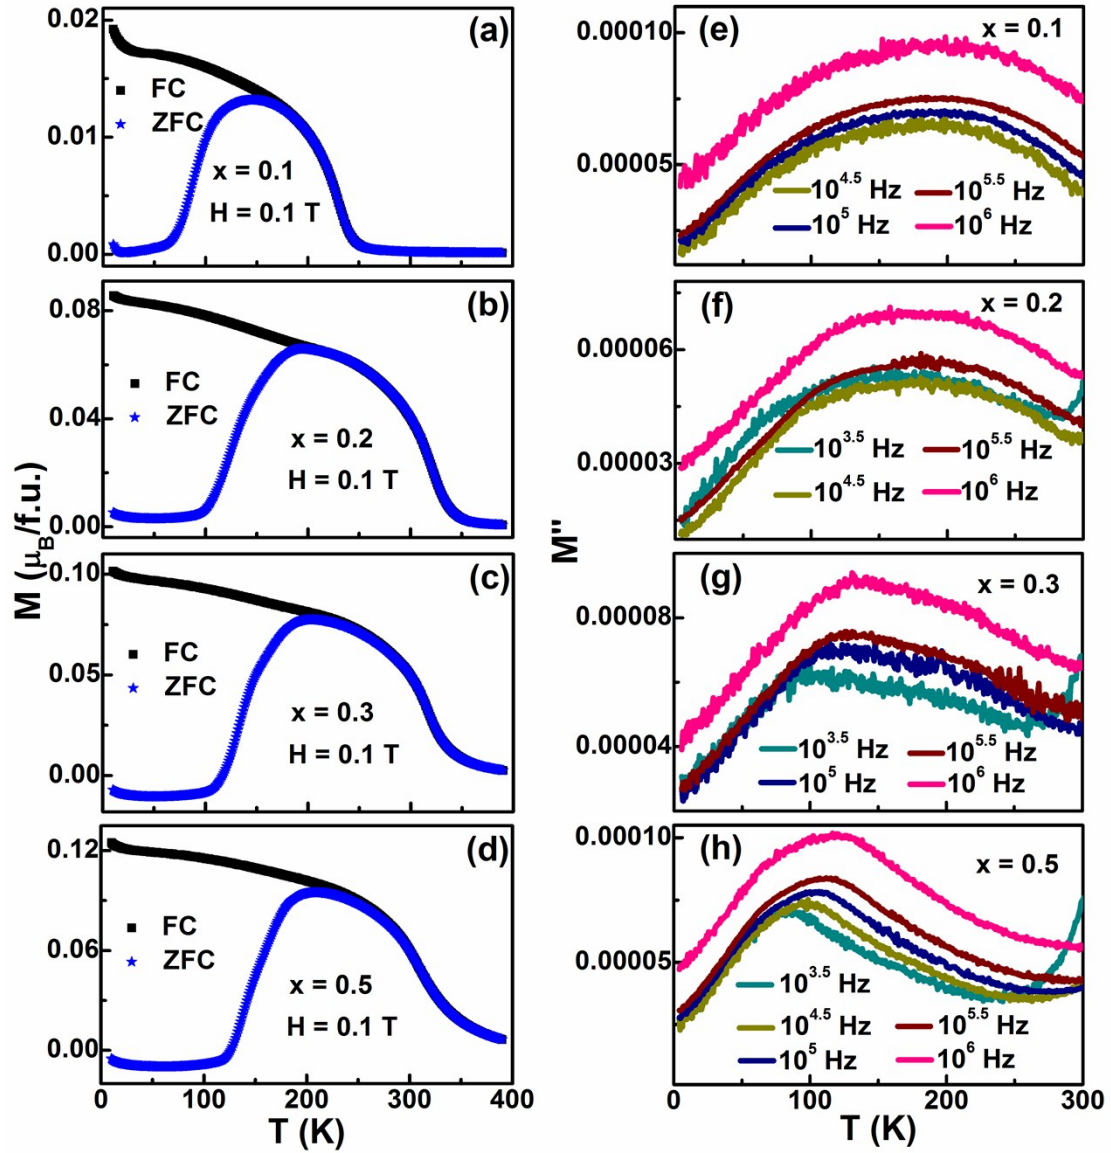

**Fig. S4** (a)-(d) Magnetization as a function of temperature measured under ZFC and 0.1 T FC conditions for the samples with  $x = 0.1, 0.2, 0.3,$  and  $0.5$ , respectively. (e)-(h) Temperature dependent imaginary part ( $M''$ ) of dielectric modulus for the corresponding samples at various frequencies.
